# Supplementary material for: Stripping back the modern to reveal the Cenomanian–Turonian climate and temperature gradient underneath
Source: Copernicus journal article supplement (doi:10.5194/cp-16-953-2020), 2020-06-05
Supplement: Supplementary file 3 [file cp-16-953-2020-supplement.zip]

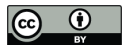

## *Supplement of*

# **Stripping back the modern to reveal the Cenomanian–Turonian climate and temperature gradient underneath**

**Marie Laugie et al.**

*Correspondence to:* Marie Laugie ([laugie@cerege.fr](mailto:laugie@cerege.fr))

- cp-16-953-2020-supplement-title-page.pdf
- SOM-Cretaceous-IPSLCM5A2
  - .DS\_Store
  - SOM-Cretaceous-IPSLCM5A2.pdf
  - SupplementaryData-Proxies-Paleotemp.xlsx
- \_\_MACOSX
  - SOM-Cretaceous-IPSLCM5A2
    - \* .\_DS\_Store
    - \* .\_SOM-Cretaceous-IPSLCM5A2.pdf
    - \* .\_SupplementaryData-Proxies-Paleotemp.xlsx

The copyright of individual parts of the supplement might differ from the CC BY 4.0 License.
